# Supplementary material for: Facile synthesis of photoactivatable adenosine analogs
Source: Royal Society of Chemistry journal article supplement (doi:10.1039/d1ra08794k), 2022-01-01

## Supporting Information

### Facile Synthesis of Photoactivatable Adenosine Analogs

Dawanna S. White,<sup>1,#</sup> Daniel Mongeluzi,<sup>1,#</sup> Alyson M. Curry,<sup>1</sup> Dickson Donu,<sup>1</sup> Yana Cen<sup>1,2,\*</sup>

<sup>1</sup>*Department of Medicinal Chemistry, Virginia Commonwealth University, Richmond, VA 23219*

<sup>2</sup>*Institute for Structural Biology, Drug Discovery and Development, Virginia Commonwealth University, Richmond, VA 23219*

#These authors contributed equally to this work.

\*Correspondence: [ceny2@vcu.edu](mailto:ceny2@vcu.edu), phone: 804-828-7405

**Figure S1.** Photoaffinity labeling and affinity enrichment of recombinant EHMT1 using probe 1.

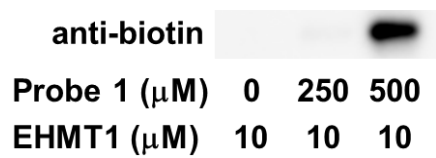

## Synthesis of Chemical Probes

### *Synthesis of probe 1 (plan 1)*

**Synthesis of 1.** To a solution of 8-bromoinosine (1 g, 2.88 mmol) in anhydrous CH<sub>2</sub>Cl<sub>2</sub> (10 mL) was added DMAP (35.2 mg, 0.288 mmol). The mixture was cooled down to 0°C. To this solution was added acetic anhydride (2.72 mL, 28.8 mmol) dropwise. The reaction mixture was then allowed to warm to room temperature and stirred overnight. Reaction was quenched with ice water, aqueous layer was extracted with CH<sub>2</sub>Cl<sub>2</sub>, combined organic layer was washed with brine and dried over Na<sub>2</sub>SO<sub>4</sub>. Solvent was evaporated under reduced pressure, and the crude product was purified by silica gel column chromatography (CH<sub>2</sub>Cl<sub>2</sub> with 5% methanol) to afford intermediate **1** (934 mg, 1.98 mmol, 68.7% yield) as a pale yellow oil. <sup>1</sup>H NMR (CDCl<sub>3</sub>, 400 MHz) δ (ppm): 2.05 (s, 3H), 2.09 (s, 3H), 2.14 (s, 3H), 4.30 (dd, *J* = 6.0, 11.6 Hz, 1H), 4.37 (d, *J* = 3.1 Hz, 1H), 4.47 (d, *J* = 11.2 Hz, 1H), 5.76 (t, *J* = 5.7 Hz, 1H), 6.08 (d, *J* = 4.4 Hz, 1H), 6.20 (d, *J* = 5.5 Hz, 1H), 8.07 (s, 1H), 12.41 (s, 1H). <sup>13</sup>C NMR (CDCl<sub>3</sub>, 100 MHz) δ (ppm): 20.37, 20.50, 20.70, 63.00, 70.33, 72.09, 80.18, 88.77, 125.82, 126.57, 145.09, 149.77, 157.44, 169.32, 169.47, 170.46. HRMS (*m/z*): calculated for C<sub>16</sub>H<sub>17</sub>BrN<sub>4</sub>O<sub>8</sub>Na (M+Na): 495.0122; found: 495.0099.

**Synthesis of 2.** To a solution of **1** (734 mg, 1.55 mmol) in 6 mL of anhydrous DMF was added NaN<sub>3</sub> (403 mg, 6.20 mmol). The reaction was heated at 80°C until completion. The reaction was cooled to room temperature. Solvent was evaporated under reduced pressure. The residue was dissolved in water and extracted with CH<sub>2</sub>Cl<sub>2</sub>. The combined organic layer was washed with sat. NaHCO<sub>3</sub>, water and brine and dried over Na<sub>2</sub>SO<sub>4</sub>. Solvent was evaporated under reduced pressure, and the crude product was purified by silica gel column chromatography (CH<sub>2</sub>Cl<sub>2</sub> with 5% methanol) to afford intermediate **2** (406 mg, 0.93 mmol, 60.2% yield) as a yellow oil. <sup>1</sup>H NMR (CDCl<sub>3</sub>, 400 MHz) δ (ppm): 2.04 (s, 3H), 2.07 (s, 3H), 2.11 (s, 3H), 4.30 (m, 2H), 4.43 (dd,

$J = 3.2, 11.5$  Hz, 1H), 5.67 (t,  $J = 5.8$  Hz, 1H), 5.93 (d,  $J = 4.8$  Hz, 1H), 6.04 (t,  $J = 5.6$  Hz, 1H), 8.09 (s, 1H), 13.35 (s, 1H).  $^{13}\text{C}$  NMR ( $\text{CDCl}_3$ , 100 MHz)  $\delta$  (ppm): 20.37, 20.46, 20.64, 63.01, 70.32, 71.96, 79.88, 85.75, 123.20, 144.08, 145.07, 148.77, 157.64, 169.34, 169.47, 170.40. HRMS ( $m/z$ ): calculated for  $\text{C}_{16}\text{H}_{17}\text{N}_7\text{O}_8\text{Na}$  ( $\text{M}+\text{Na}$ ): 458.1036; found: 458.1020.

**Synthesis of 3.** To a solution of **2** (406 mg, 0.93 mmol) and PyBOP (729 mg, 1.40 mmol) in 10 mL anhydrous acetonitrile was added DIPEA (325  $\mu\text{L}$ , 1.87 mmol). To the reaction mixture was then added mono-*N*-Boc-1,6-diaminohexane (418  $\mu\text{L}$ , 1.87 mmol) dropwise. The reaction was stirred at room temperature overnight. The reaction was quenched with water and the mixture was extracted with ethyl acetate. The combined organic layer was washed with brine and dried over  $\text{Na}_2\text{SO}_4$ . Solvent was evaporated under reduced pressure, and the crude product was purified by silica gel column chromatography ( $\text{CH}_2\text{Cl}_2$  with 5% methanol) to afford intermediate **3** (324 mg, 0.51 mmol, 55% yield) as a yellow oil.  $^1\text{H}$  NMR ( $\text{CDCl}_3$ , 400 MHz)  $\delta$  (ppm): 1.36 (m, 2H), 1.42 (s, 9H), 1.46 (stack, 6H), 2.04 (s, 3H), 2.06 (s, 3H), 2.11 (s, 3H), 3.08 (m, 2H), 3.62 (m, 2H), 4.30 (m, 2H), 4.47 (m, 2H), 5.79 (t,  $J = 5.4$  Hz, 1H), 5.96 (d,  $J = 4.6$  Hz, 1H), 6.13 (t,  $J = 5.6$  Hz, 1H), 8.25 (s, 1H).  $^{13}\text{C}$  NMR ( $\text{CDCl}_3$ , 100 MHz)  $\delta$  (ppm): 20.42, 20.48, 20.64, 26.43, 26.47, 28.41, 29.78, 30.01, 30.86, 53.38, 63.04, 70.46, 71.99, 79.82, 85.42, 144.19, 155.98, 169.38, 169.48, 170.49. HRMS ( $m/z$ ): calculated for  $\text{C}_{27}\text{H}_{39}\text{N}_9\text{O}_9\text{Na}$  ( $\text{M}+\text{Na}$ ): 656.2763; found: 656.2735.

**Synthesis of 4.** Intermediate **3** (230 mg, 0.36 mmol) was dissolved in a mixture of  $\text{CH}_2\text{Cl}_2/\text{TFA}$  (4 mL, v/v = 9/1). The reaction mixture was stirred at room temperature for 4 h before the solvent was removed under reduced pressure. The crude product was purified by silica gel column chromatography ( $\text{CH}_2\text{Cl}_2$  with 10% methanol) to afford intermediate **4** (153 mg, 0.29 mmol, 79.5% yield) as a yellow oil.  $^1\text{H}$  NMR ( $\text{CDCl}_3$ , 400 MHz)  $\delta$  (ppm): 1.36 (stack, 4H), 1.62

(stack, 4H), 2.01 (s, 3H), 2.04 (s, 3H), 2.09 (s, 3H), 2.89 (t,  $J = 7.4$  Hz, 2H), 3.57 (m, 1H), 4.28 (m, 2H), 4.43 (m 1H), 5.78 (t,  $J = 5.6$  Hz, 1H), 5.93 (d,  $J = 4.6$  Hz, 1H), 6.13 (t,  $J = 5.5$  Hz, 1H), 8.20 (s, 1H).  $^{13}\text{C}$  NMR ( $\text{CDCl}_3$ , 100 MHz)  $\delta$  (ppm): 20.36, 20.45, 20.59, 25.83, 26.03, 27.24, 29.38, 30.83, 39.78, 63.03, 70.44, 71.95, 79.76, 85.38, 114.93, 117.73, 117.83, 144.11, 153.15, 169.47, 169.54, 170.57. HRMS ( $m/z$ ): calculated for  $\text{C}_{22}\text{H}_{31}\text{N}_9\text{O}_7\text{Na}$  ( $\text{M}+\text{Na}$ ): 533.2346; found: 533.2341.

**Synthesis of 5.** To a solution of biotin (71 mg, 0.29 mmol), EDCI (55 mg, 0.29 mmol) and DMAP (53 mg, 0.43 mmol) in 2 mL anhydrous DMF was added a solution of intermediate **4** (154 mg, 0.29 mmol) in 4 mL anhydrous  $\text{CH}_2\text{Cl}_2$ . The reaction mixture was stirred at room temperature overnight. The reaction was quenched with water, the aqueous layer was extracted with  $\text{CH}_2\text{Cl}_2$ . The combined organic layer was washed with brine and dried over  $\text{Na}_2\text{SO}_4$ . Solvent was evaporated under reduced pressure, and the crude product was purified by silica gel column chromatography ( $\text{CH}_2\text{Cl}_2$  with 10% methanol) to afford intermediate **5** (136 mg, 0.18 mmol, 62% yield) as a yellow oil.  $^1\text{H}$  NMR ( $\text{CD}_3\text{OD}$ , 400 MHz)  $\delta$  (ppm): 1.41 (stack, 6H), 1.51 (m, 2H), 1.66 (stack, 6H), 2.00 (s, 3H), 2.06 (s, 3H), 2.12 (s, 3H), 2.17 (t,  $J = 7.2$  Hz, 2H), 2.66 (d,  $J = 12.7$  Hz, 1H), 2.87 (dd,  $J = 5.0, 12.7$  Hz, 1H), 3.16 (m, 3H), 3.54 (s, broad, 2H), 4.30 (stack, 3H), 4.45 (m, 2H), 5.77 (t,  $J = 5.8$  Hz, 1H), 5.97 (d,  $J = 4.7$  Hz, 1H), 6.14 (t,  $J = 5.8$  Hz, 1H), 8.16 (s, 1H).  $^{13}\text{C}$  NMR ( $\text{CDCl}_3$ , 100 MHz)  $\delta$  (ppm): 20.38, 20.44, 20.61, 25.57, 26.42, 26.52, 27.99, 28.08, 29.41, 29.57, 35.87, 39.35, 40.55, 55.64, 60.10, 61.81, 63.01, 70.42, 71.95, 79.75, 85.39, 117.73, 143.94, 152.39, 153.28, 164.02, 169.39, 169.47, 170.47, 173.07. HRMS ( $m/z$ ): calculated for  $\text{C}_{32}\text{H}_{45}\text{N}_{11}\text{O}_9\text{SNa}$  ( $\text{M}+\text{Na}$ ): 782.3014; found: 782.3022.

**Synthesis of probe 1.** Intermediate **5** (25 mg, 0.033 mmol) was dissolved in 0.2 mL methanol. The solution was cooled down to  $0^\circ\text{C}$ . To the reaction mixture was added 1 mL 7N ammonia in

methanol. The reaction was stirred at 0°C overnight. Solvent was removed under reduced pressure, and the crude product was purified by silica gel column chromatography (CH<sub>2</sub>Cl<sub>2</sub> with 20% methanol) to afford **probe 1** (21 mg, 0.033 mmol, quantitatively) as a yellow oil. <sup>1</sup>H NMR (CD<sub>3</sub>OD, 400 MHz) δ (ppm): 1.41 (stack, 6H), 1.51 (m, 2H), 1.66 (stack, 6H), 2.17 (t, *J* = 7.3 Hz, 2H), 2.67 (d, *J* = 12.8 Hz, 1H), 2.88 (dd, *J* = 5.0, 12.7 Hz, 1H), 3.15 (m, 2H), 3.70 (dd, *J* = 3.0, 12.6 Hz, 1H), 3.84 (dd, *J* = 2.4, 12.6 Hz, 1H), 4.12 (m, 1H), 4.26 (dd, *J* = 4.5, 7.9 Hz, 1H), 4.30 (dd, *J* = 1.6, 5.2 Hz, 1H), 4.45 (dd, *J* = 4.9, 7.8 Hz, 1H), 5.77 (d, *J* = 7.2 Hz, 1H), 8.10 (s, 1H). <sup>13</sup>C NMR (CD<sub>3</sub>OD, 100 MHz) δ (ppm): 27.07, 27.75, 27.86, 29.65, 29.91, 30.50, 36.96, 40.43, 41.16, 57.15, 61.75, 63.52, 64.17, 73.11, 74.24, 88.81, 90.13, 146.62, 152.57, 176.10. HRMS (*m/z*): calculated for C<sub>26</sub>H<sub>39</sub>N<sub>11</sub>O<sub>6</sub>SNa (M+Na): 656.2697; found: 656.2706.

**Synthesis of probe 2.** Intermediate **5** (61 mg, 0.081 mmol) was dissolved in 1 mL 7N ammonia in methanol at -40°C. The reaction was stirred at -40°C for 2 h. Upon completion, the solvent was removed under reduced pressure. The crude product was purified by silica gel column chromatography (CH<sub>2</sub>Cl<sub>2</sub> with 10% methanol) to afford **probe 2** (39 mg, 0.058 mmol, 72%) as a yellow oil. <sup>1</sup>H NMR (CD<sub>3</sub>OD, 400 MHz) δ (ppm): 1.41 (stack, 6H), 1.50 (m, 2H), 1.66 (stack, 6H), 1.98 (s, 3H), 2.17 (t, *J* = 7.3 Hz, 2H), 2.66 (d, *J* = 12.7 Hz, 1H), 2.87 (dd, *J* = 5.0, 12.8 Hz, 1H), 3.16 (m, 3H), 3.55 (s, broad, 2H), 4.11 (m, 1H), 4.26 (m, 2H), 4.44 (m, 2H), 4.52 (m, 1H), 5.05 (t, *J* = 5.3 Hz, 1H), 5.81 (d, *J* = 4.9 Hz, 1H), 8.13 (s, 1H). <sup>13</sup>C NMR (CD<sub>3</sub>OD, 100 MHz) δ (ppm): 27.07, 27.77, 27.88, 29.66, 29.91, 30.51, 36.97, 40.45, 41.16, 57.15, 61.76, 63.53, 65.28, 72.17, 73.11, 83.56, 89.60, 153.17, 172.66, 176.11. HRMS (*m/z*): calculated for C<sub>28</sub>H<sub>41</sub>N<sub>11</sub>O<sub>7</sub>SNa (M+Na): 698.2803; found: 698.2789.

*Synthesis of probe 1 (plan 2)*

**Synthesis of 6.** 8-Brominosine (500 mg, 1.45 mmol) was dissolved in a mixture of acetone

and 2,2-dimethoxypropane (25 mL, v/v = 4/1). To this solution was added *p*-TsOH (275 mg, 1.45 mmol). The reaction was stirred at room temperature overnight. The reaction was quenched with NaHCO<sub>3</sub> (121 mg, 1.45 mmol) and sat. NaHCO<sub>3</sub> solution (6 mL). The mixture was stirred at room temperature for 1 h. The aqueous layer was extracted with ethyl acetate. The combined organic layer was washed with brine and dried over Na<sub>2</sub>SO<sub>4</sub>. Solvent was evaporated under reduced pressure, and the crude product was purified by silica gel column chromatography (CH<sub>2</sub>Cl<sub>2</sub> with 10% methanol) to afford intermediate **6** (315 mg, 0.82 mmol, 56.3% yield) as a pale yellow oil. <sup>1</sup>H NMR (CDCl<sub>3</sub>, 600 MHz) δ (ppm): 1.36 (s, 3H), 1.63 (s, 3H), 3.76 (d, *J* = 12.4 Hz, 1H), 3.91 (d, *J* = 12.4 Hz, 1H), 4.45 (s, 1H), 5.04 (d, *J* = 5.8 Hz, 1H), 5.22 (t, *J* = 5.4 Hz, 1H), 6.08 (t, *J* = 4.6 Hz, 1H), 8.35 (s, 1H), 12.96 (s, 1H). <sup>13</sup>C NMR (CDCl<sub>3</sub>, 100 MHz) δ (ppm): 25.40, 27.56, 62.99, 81.24, 82.84, 85.82, 93.26, 114.39, 126.01, 126.42, 146.07, 148.91, 157.27. HRMS (*m/z*): calculated for C<sub>13</sub>H<sub>16</sub>BrN<sub>4</sub>O<sub>5</sub> (M+H): 387.0299; found: 387.0301.

**Synthesis of 7.** To a solution of intermediate **6** (201 mg, 0.52 mmol) in 5 mL anhydrous CH<sub>2</sub>Cl<sub>2</sub> was added TEA (109 μL, 0.78 mmol) and DMAP (13 mg, 0.10 mmol). The reaction mixture was cooled down to 0°C. To the reaction mixture was added acetic anhydride (54 μL, 0.57 mmol) dropwise. The reaction was allowed to warm to room temperature and stirred overnight. The reaction was quenched with ice water. The aqueous layer was extracted with CH<sub>2</sub>Cl<sub>2</sub>. The combined organic layer was washed with brine and dried over Na<sub>2</sub>SO<sub>4</sub>. Solvent was evaporated under reduced pressure, and the crude product was purified by silica gel column chromatography (CH<sub>2</sub>Cl<sub>2</sub> with 5% methanol) to afford intermediate **7** (181 mg, 0.42 mmol, 81.5% yield) as a yellow oil. <sup>1</sup>H NMR (CDCl<sub>3</sub>, 400 MHz) δ (ppm): 1.38 (s, 3H), 1.60 (s, 3H), 2.02 (s, 3H), 4.17 (dd, *J* = 7.2, 11.6 Hz, 1H), 4.31 (dd, *J* = 4.9, 11.6 Hz, 1H), 4.37 (m, 1H), 5.10 (dd, *J* = 4.3, 5.9 Hz, 1H), 5.52 (d, *J* = 6.4 Hz, 1H), 6.20 (s, 1H), 8.33 (s, 1H), 13.08 (s, 1H). <sup>13</sup>C NMR (CDCl<sub>3</sub>, 100 MHz) δ (ppm): 20.72, 25.38, 27.17, 63.77, 81.65, 83.65, 85.27, 91.14, 114.85, 125.54,

126.53, 145.86, 149.51, 170.48. HRMS ( $m/z$ ): calculated for  $C_{15}H_{17}BrN_4O_6Na$  (M+Na): 451.0224; found: 451.0221.

**Synthesis of 8.** To a solution of intermediate **7** (181 mg, 0.42 mmol) in 6 mL anhydrous DMF was added  $NaN_3$  (110 mg, 1.69 mmol). The reaction was heated at 80°C until completion. The reaction was cooled to room temperature. Solvent was evaporated under reduced pressure. The residue was dissolved in water and extracted with  $CH_2Cl_2$ . The combined organic layer was washed with sat.  $NaHCO_3$ , water and brine and dried over  $Na_2SO_4$ . Solvent was evaporated under reduced pressure, and the crude product was purified by silica gel column chromatography ( $CH_2Cl_2$  with 5% methanol) to afford intermediate **8** (90 mg, 0.23 mmol, 54.6% yield) as a yellow oil.  $^1H$  NMR ( $CDCl_3$ , 400 MHz)  $\delta$  (ppm): 1.33 (s, 3H), 1.55 (s, 3H), 1.99 (s, 3H), 4.13 (m, 1H), 4.30 (m, 2H), 4.98 (m, 1H), 5.37 (d,  $J = 6.4$  Hz, 1H), 5.99 (s, 1H), 8.24 (s, 1H), 13.34 (s, 1H).  $^{13}C$  NMR ( $CDCl_3$ , 100 MHz)  $\delta$  (ppm): 25.26, 27.04, 31.32, 63.78, 81.47, 83.38, 84.84, 88.36, 114.69, 122.88, 144.77, 144.84, 148.40, 157.85, 170.38. HRMS ( $m/z$ ): calculated for  $C_{15}H_{17}N_7O_6Na$  (M+Na): 414.1133; found: 414.1131.

**Synthesis of 9.** To a solution of **8** (129 mg, 0.33 mmol) and PyBOP (258 mg, 0.50 mmol) in 2 mL anhydrous acetonitrile was added DIPEA (115  $\mu$ L, 0.66 mmol). To the reaction mixture was then added mono-*N*-Boc-1,6-diaminohexane (148  $\mu$ L, 0.66 mmol) dropwise. The reaction was stirred at room temperature overnight. The reaction was quenched with water and the mixture was extracted with ethyl acetate. The combined organic layer was washed with brine and dried over  $Na_2SO_4$ . Solvent was evaporated under reduced pressure, and the crude product was purified by silica gel column chromatography ( $CH_2Cl_2$  with 7% methanol) to afford intermediate **9** (169 mg, 0.29 mmol, 86.7% yield) as a yellow oil.  $^1H$  NMR ( $CDCl_3$ , 400 MHz)  $\delta$  (ppm): 1.33 (m, 2H), 1.35 (s, 3H), 1.40 (s, 9H), 1.43 (m, 4H), 1.56 (s, 3H), 1.66 (m, 2H), 1.99 (s, 3H), 3.07 (m,



2H), 3.58 (m, 2H), 4.14 (m, 1 H), 4.31 (m, 2H), 5.09 (dd,  $J = 3.4, 6.3$  Hz, 1H), 5.51 (dd,  $J = 1.7, 6.4$  Hz, 1H), 5.97 (d,  $J = 1.7$  Hz, 1 H), 8.22 (s, 1H).  $^{13}\text{C}$  NMR ( $\text{CDCl}_3$ , 100 MHz)  $\delta$  (ppm): 20.69, 25.41, 26.39, 26.44, 27.13, 28.38, 29.70, 29.96, 40.39, 63.99, 78.98, 81.84, 83.30, 85.09, 88.31, 114.38, 117.86, 144.19, 152.15, 153.18, 155.95, 170.52. HRMS ( $m/z$ ): calculated for  $\text{C}_{26}\text{H}_{39}\text{N}_9\text{O}_7\text{Na}$  ( $\text{M}+\text{Na}$ ): 612.2865; found: 612.2878.

**Synthesis of 10.** Intermediate **9** (143 mg, 0.24 mmol) was dissolved in a mixture of  $\text{CH}_2\text{Cl}_2/\text{TFA}$  (5 mL,  $v/v = 4/1$ ). The reaction mixture was stirred at room temperature for 4 h before the solvent was removed under reduced pressure. The crude product was purified by silica gel column chromatography ( $\text{CH}_2\text{Cl}_2$  with 10% methanol) to afford intermediate **10** (117 mg, 0.24 mmol, 99.7% yield) as a yellow oil.  $^1\text{H}$  NMR ( $\text{CD}_3\text{OD}$ , 400 MHz)  $\delta$  (ppm): 1.36 (s, 3H), 1.46 (m, 4H), 1.55 (s, 3H), 1.68 (m, 4H), 1.97 (s, 3H), 2.91 (t,  $J = 7.5$  Hz, 2H), 3.39 (s, 1H), 3.56 (s, broad, 2H), 4.21 (m, 2H), 4.31 (m, 1H), 5.11 (m, 1H), 5.56 (d,  $J = 6.3$  Hz, 1H), 5.98 (s, 1H), 8.15 (s, 1H).  $^{13}\text{C}$  NMR ( $\text{CD}_3\text{OD}$ , 100 MHz)  $\delta$  (ppm): 20.70, 25.66, 27.28, 27.50, 27.56, 28.62, 30.50, 40.78, 65.15, 83.28, 84.69, 86.48, 89.89, 115.60, 146.01, 153.03, 154.57, 172.44. HRMS ( $m/z$ ): calculated for  $\text{C}_{21}\text{H}_{32}\text{N}_9\text{O}_5$  ( $\text{M}+\text{H}$ ): 490.2521; found: 490.2504.

**Synthesis of 11.** To a solution of biotin (59 mg, 0.24 mmol), EDCI (47 mg, 0.24 mmol) and DMAP (53 mg, 0.43 mmol) in 2 mL anhydrous DMF was added a solution of intermediate **10** (119 mg, 0.24 mmol) in 4 mL anhydrous  $\text{CH}_2\text{Cl}_2$ . The reaction mixture was stirred at room temperature overnight. The reaction was quenched with water, the aqueous layer was extracted with  $\text{CH}_2\text{Cl}_2$ . The combined organic layer was washed with brine and dried over  $\text{Na}_2\text{SO}_4$ . Solvent was evaporated under reduced pressure, and the crude product was purified by silica gel column chromatography ( $\text{CH}_2\text{Cl}_2$  with 10% methanol) to afford intermediate **11** (129 mg, 0.18 mmol, 75.5% yield) as a yellow oil.  $^1\text{H}$  NMR ( $\text{CDCl}_3$ , 400 MHz)  $\delta$  (ppm): 1.36 (s, 3H), 1.41

(m, 6H), 1.48 (m, 2H), 1.56 (s, 3H), 1.65 (m, 6H), 1.99 (s, 3H), 2.16 (t,  $J = 7.2$  Hz, 2H), 2.68 (d, 12.7 Hz, 1H), 3.11 (m, 1H), 3.19 (m, 2H), 3.58 (s, broad, 2H), 4.14 (m, 1H), 4.30 (m, 3H), 4.47 (m, 1H), 5.09 (m, 1H), 5.50 (d,  $J = 6.3$  Hz, 1H), 5.77 (s, 1H), 5.98 (s, 1H), 6.19 (m, 1H), 6.43 (s, 1H), 8.21 (s, 1H).  $^{13}\text{C}$  NMR ( $\text{CDCl}_3$ , 100 MHz)  $\delta$  (ppm): 20.72, 22.64, 25.42, 25.58, 26.40, 26.51, 27.14, 27.97, 28.04, 29.39, 29.64, 35.85, 37.04, 39.34, 40.61, 55.65, 60.08, 61.83, 63.98, 81.82, 83.29, 85.10, 88.35, 114.44, 117.75, 144.25, 152.99, 164.01, 170.55, 173.10. HRMS ( $m/z$ ): calculated for  $\text{C}_{31}\text{H}_{45}\text{N}_{11}\text{O}_7\text{SNa}$  ( $\text{M}+\text{Na}$ ): 738.3116; found: 738.3080.

**Synthesis of 12.** Intermediate **11** (23 mg, 0.032 mmol) was dissolved in 1 mL 7N ammonia in methanol at  $-40^\circ\text{C}$ . The reaction was stirred at  $-40^\circ\text{C}$  for 2 h. Upon completion, the solvent was removed under reduced pressure. The crude product was purified by silica gel column chromatography ( $\text{CH}_2\text{Cl}_2$  with 10% methanol) to afford intermediate **12** (17 mg, 0.026 mmol, 80%) as a yellow oil.  $^1\text{H}$  NMR ( $\text{CD}_3\text{OD}$ , 400 MHz)  $\delta$  (ppm): 1.36 (s, 3H), 1.42 (m, 6H), 1.53 (m, 2H), 1.54 (s, 3H), 1.68 (m, 6H), 2.17 (t,  $J = 7.3$  Hz, 2H), 2.67 (d,  $J = 12.7$  Hz, 1H), 2.88 (dd,  $J = 5.0, 12.8$  Hz, 1H), 3.56 (s, broad, 2H), 3.66 (dd,  $J = 4.7, 12.1$  Hz, 1H), 3.76 (dd,  $J = 3.9, 12.1$  Hz, 1H), 4.27 (m, 2H), 4.45 (m, 1H), 5.04 (dd,  $J = 2.6, 6.1$  Hz, 1H), 5.38 (dd,  $J = 3.4, 6.1$  Hz, 1H), 5.93 (d,  $J = 3.4$  Hz, 1H), 8.13 (s, 1H).  $^{13}\text{C}$  NMR ( $\text{CD}_3\text{OD}$ , 100 MHz)  $\delta$  (ppm): 25.73, 27.07, 27.77, 27.84, 27.87, 29.65, 29.91, 30.51, 36.96, 40.44, 41.17, 57.15, 61.76, 63.53, 63.80, 83.08, 84.35, 88.28, 91.18, 115.42, 146.03, 153.00, 176.10. HRMS ( $m/z$ ): calculated for  $\text{C}_{29}\text{H}_{43}\text{N}_{11}\text{O}_6\text{SNa}$  ( $\text{M}+\text{Na}$ ): 696.3010; found: 696.2992.

**Synthesis of probe 1.** Intermediate **12** (17 mg, 0.025 mmol) was dissolved in 1 mL 50% TFA at  $0^\circ\text{C}$ . The reaction was stirred at  $0^\circ\text{C}$  for 4 h. The solvent was removed under reduced pressure. The crude product was purified by silica gel column chromatography ( $\text{CH}_2\text{Cl}_2$  with 20% methanol) to afford **probe 1** (16 mg, 0.025 mmol, quantitatively) as a yellow oil.

Figure S2. NMR spectra of the probes.

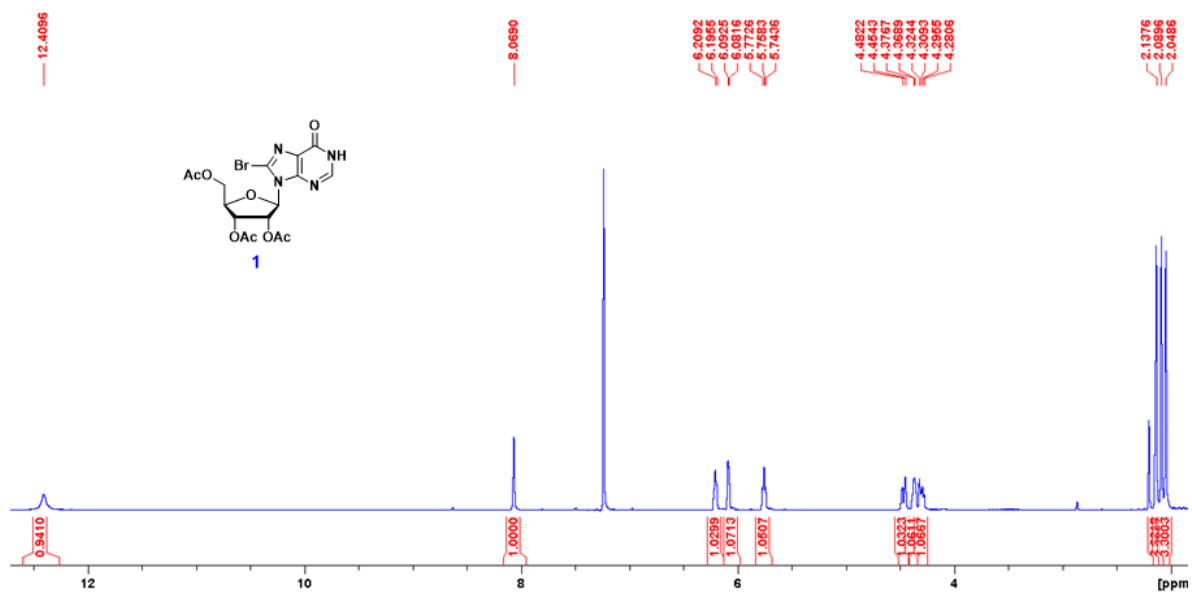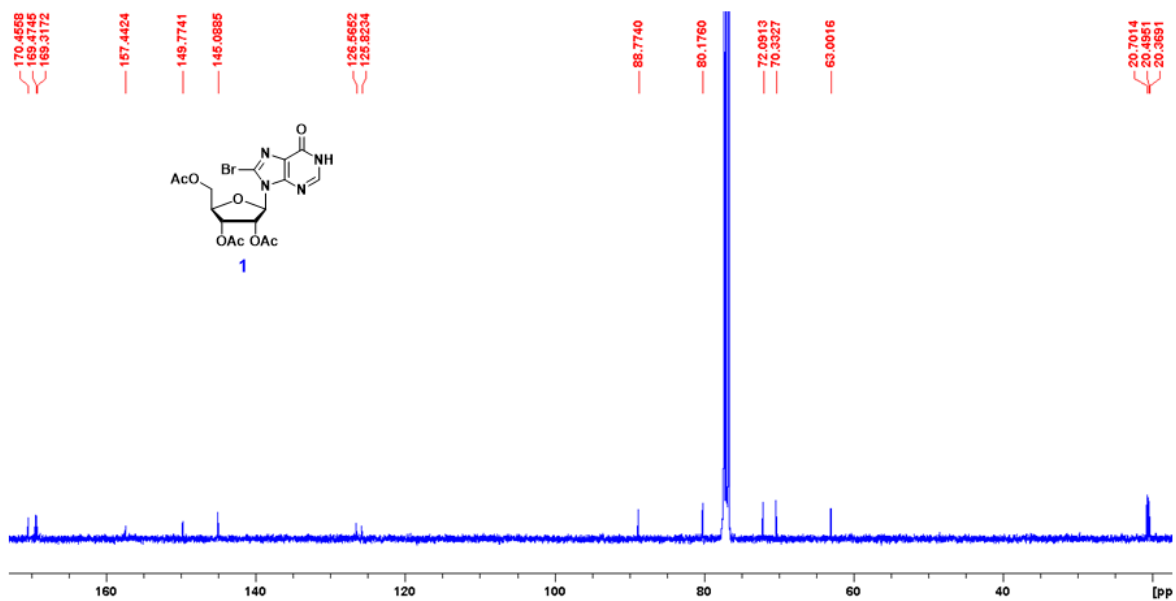

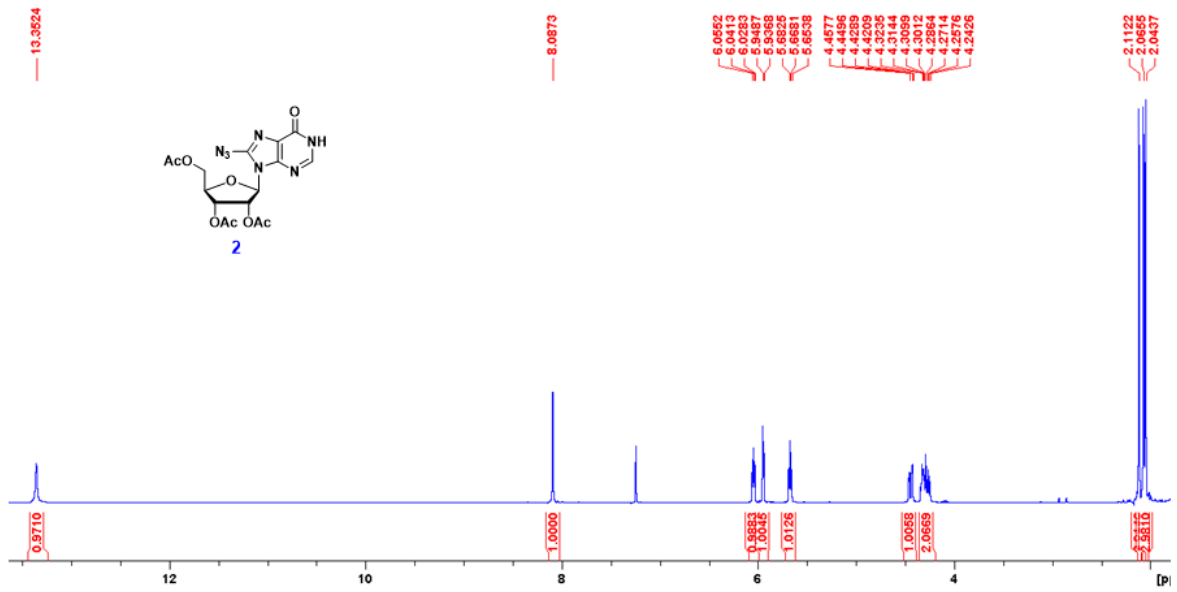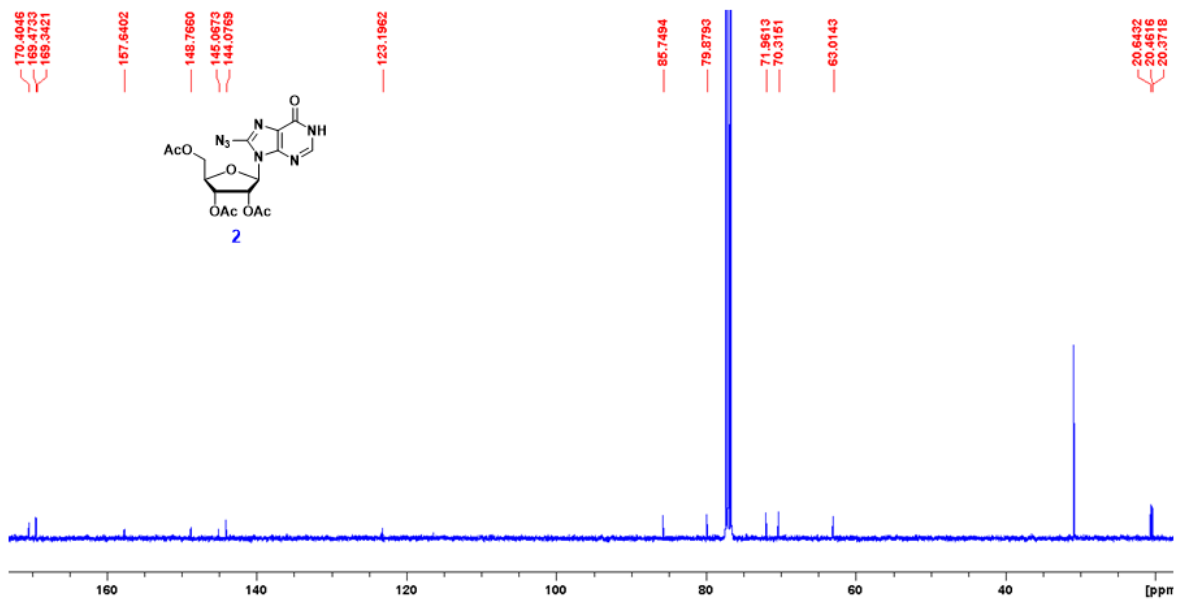

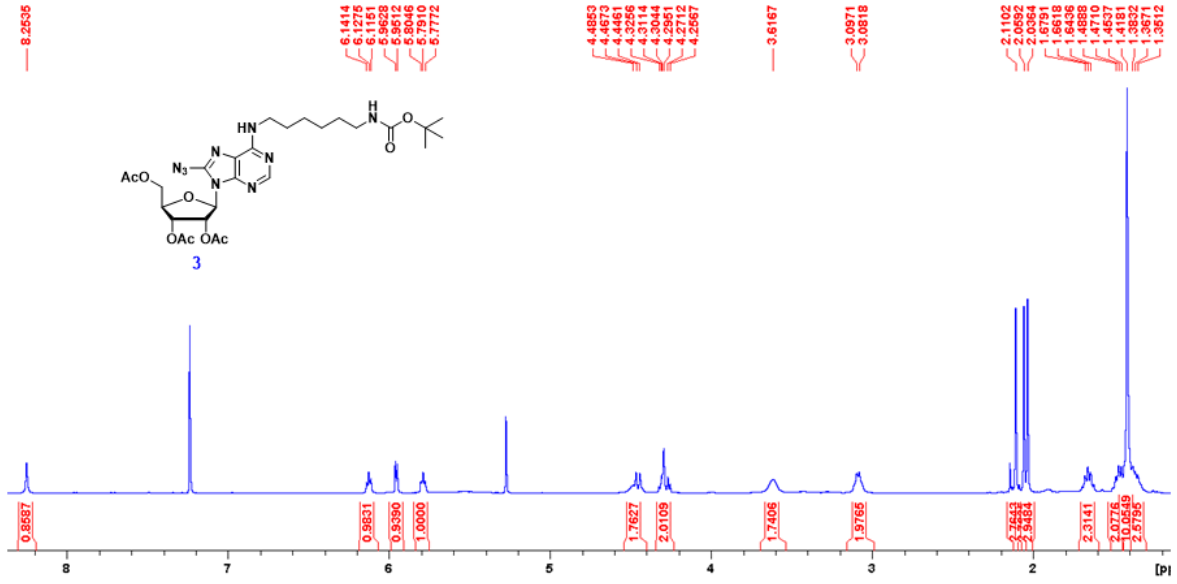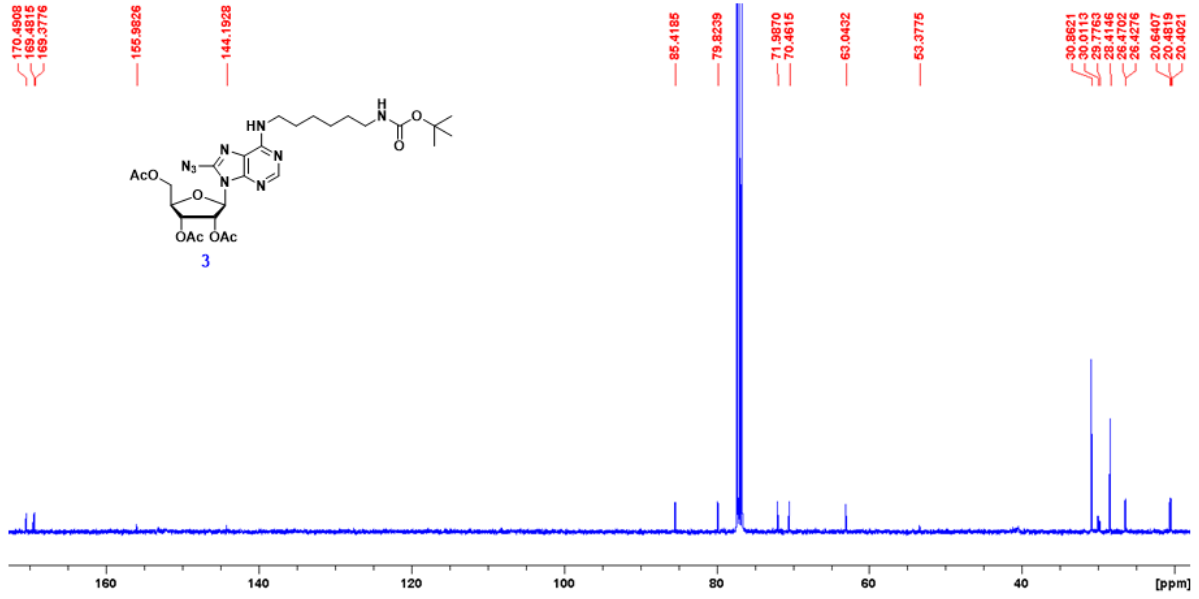

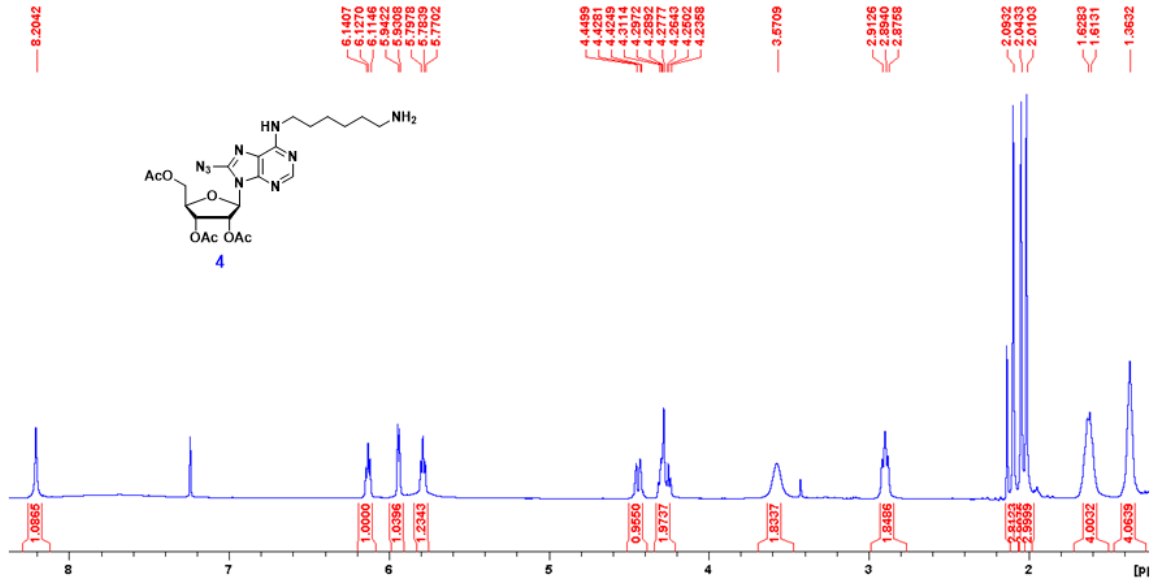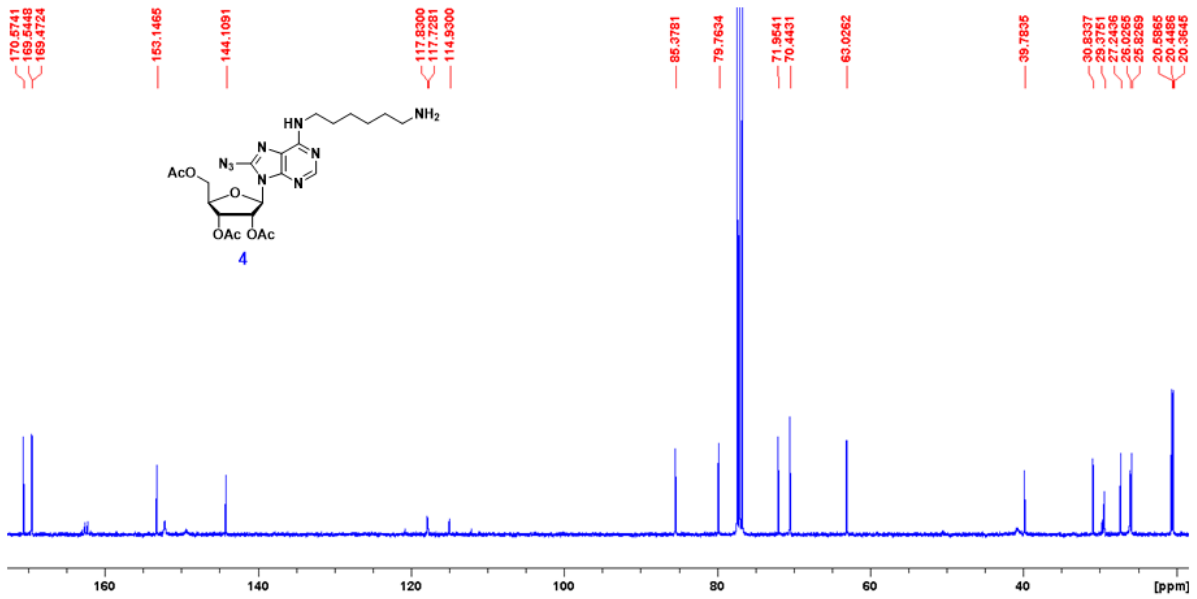

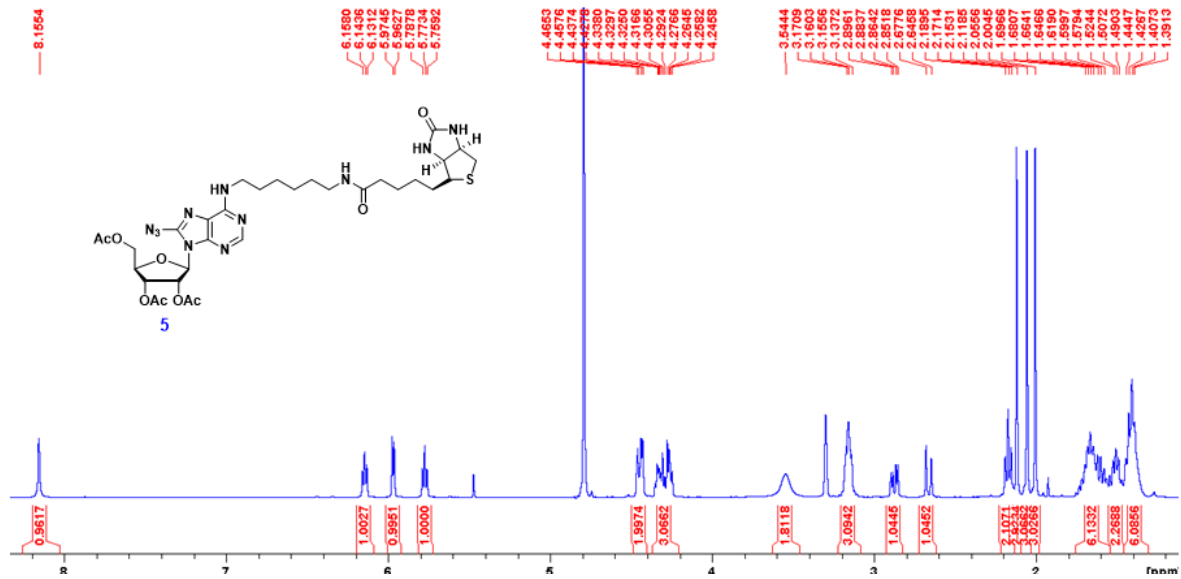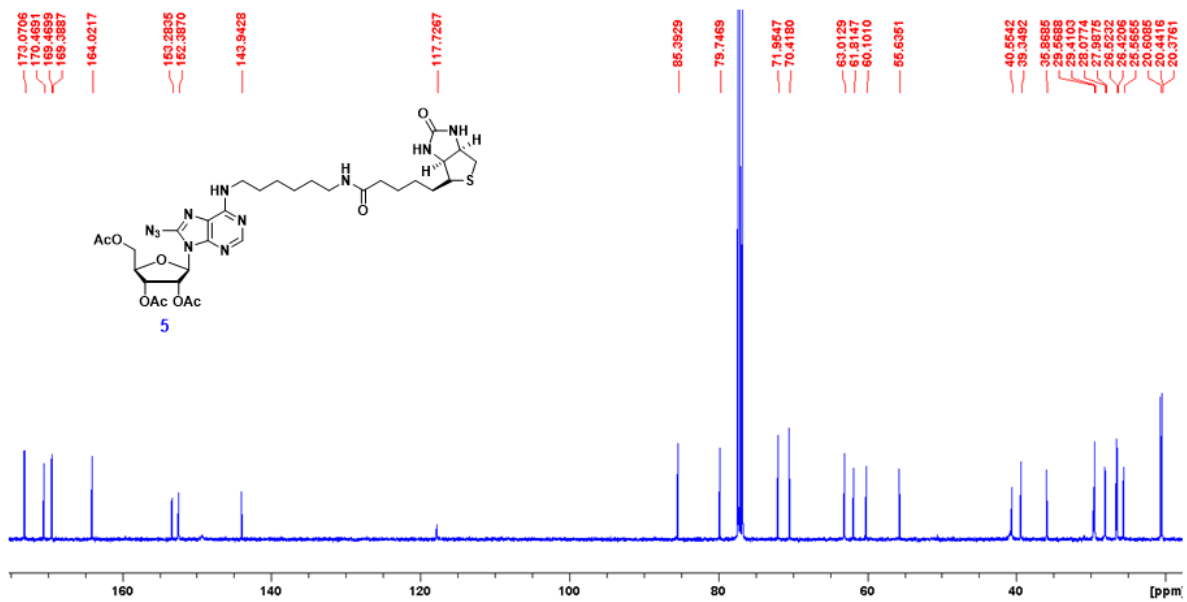

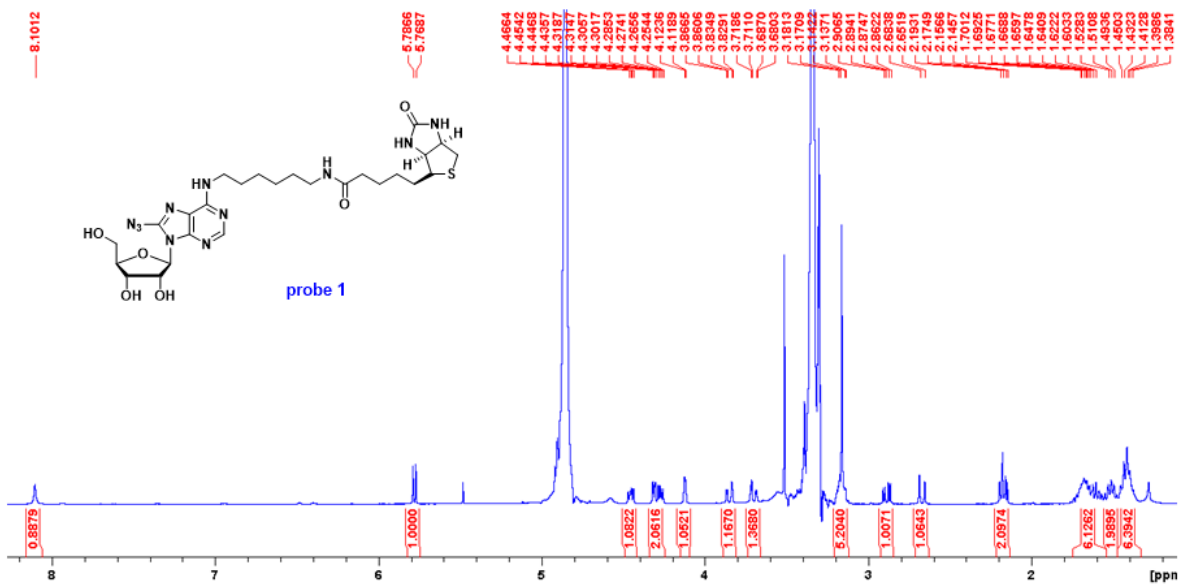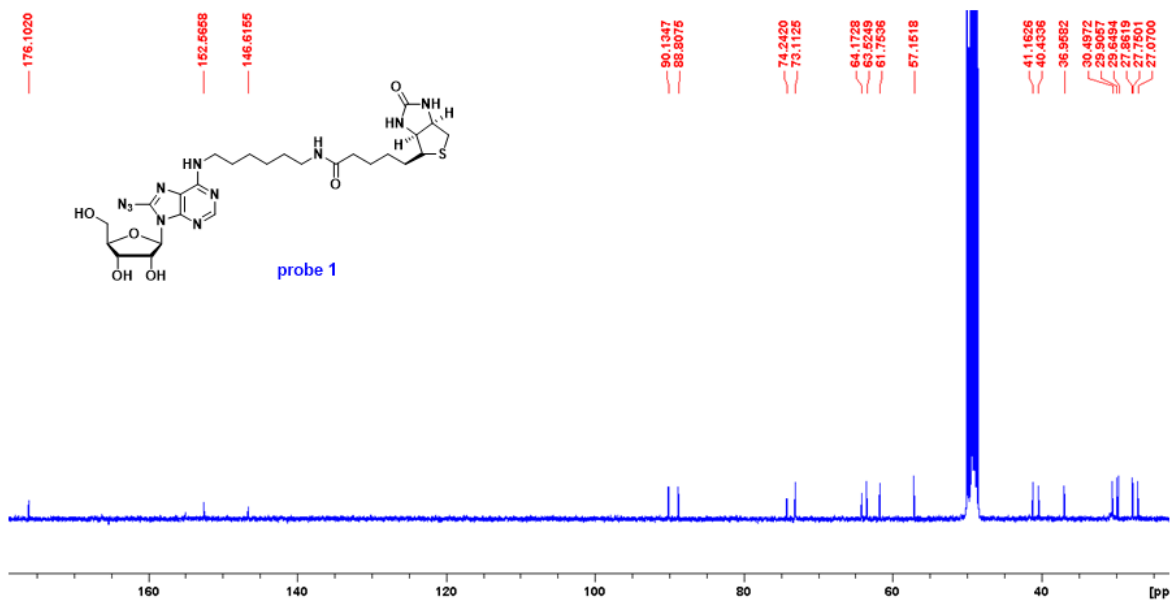





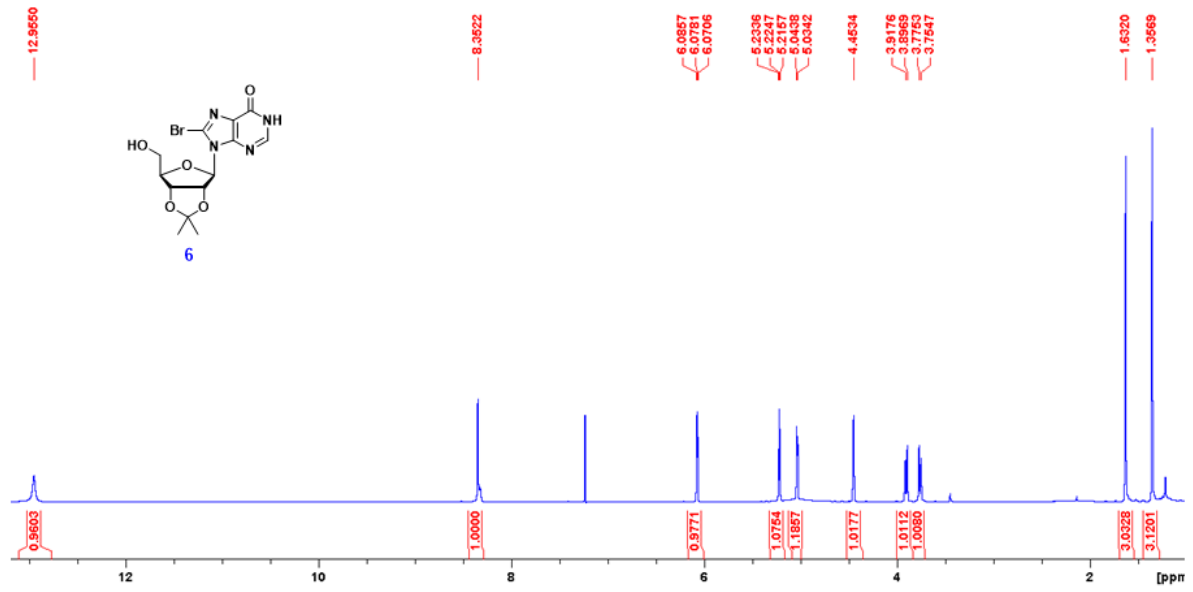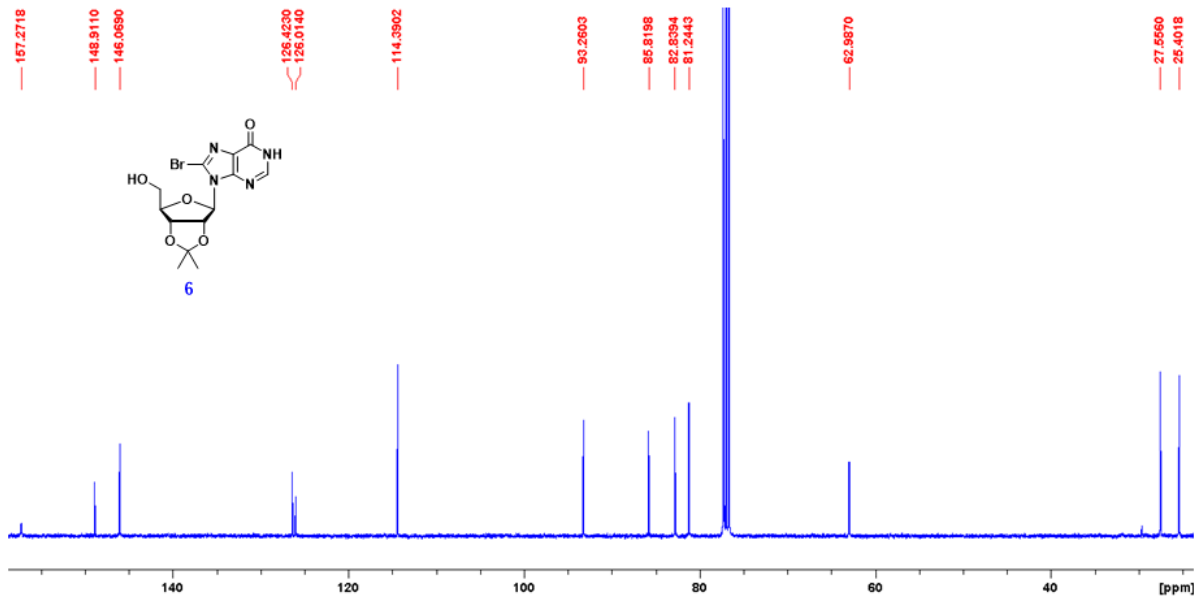

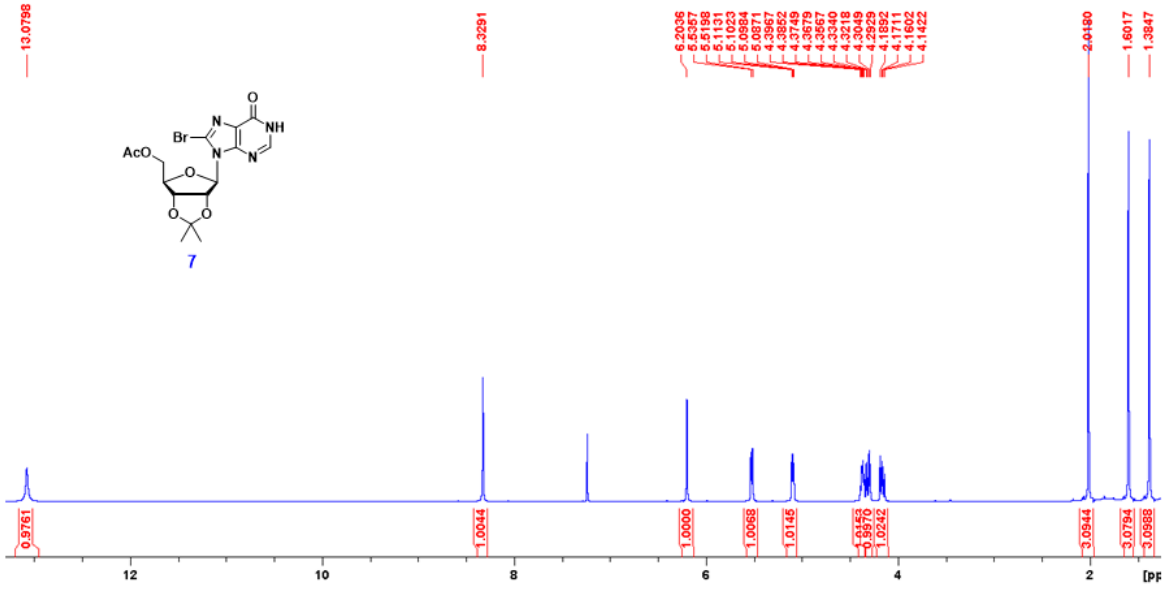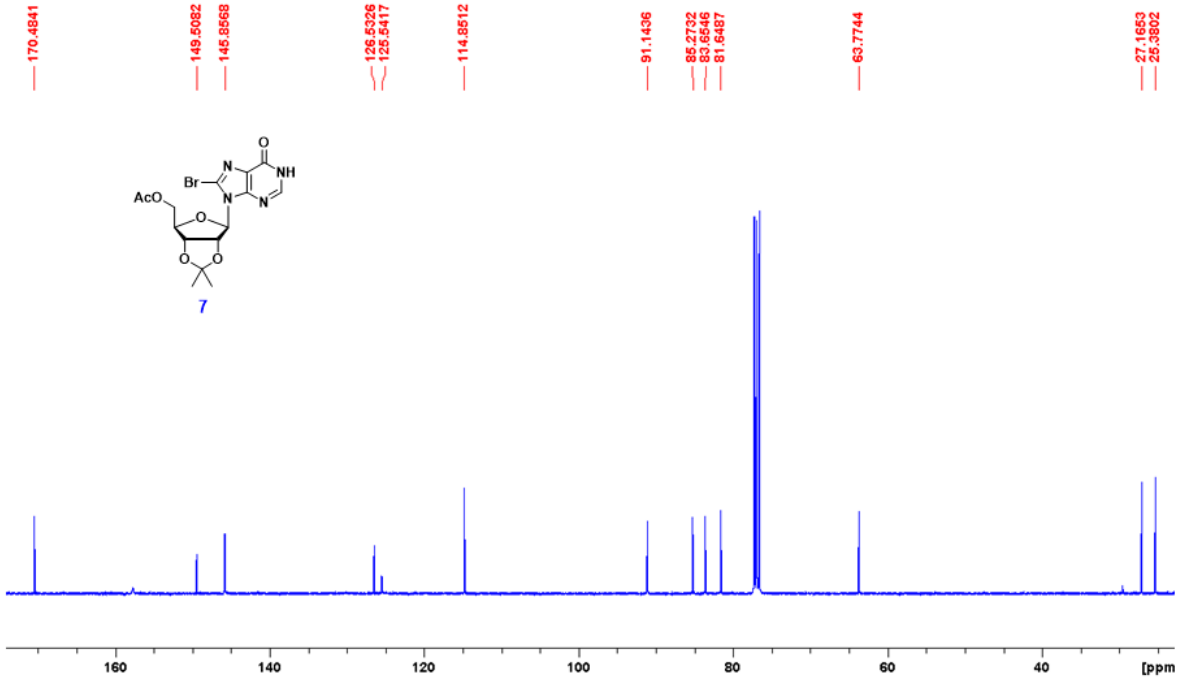

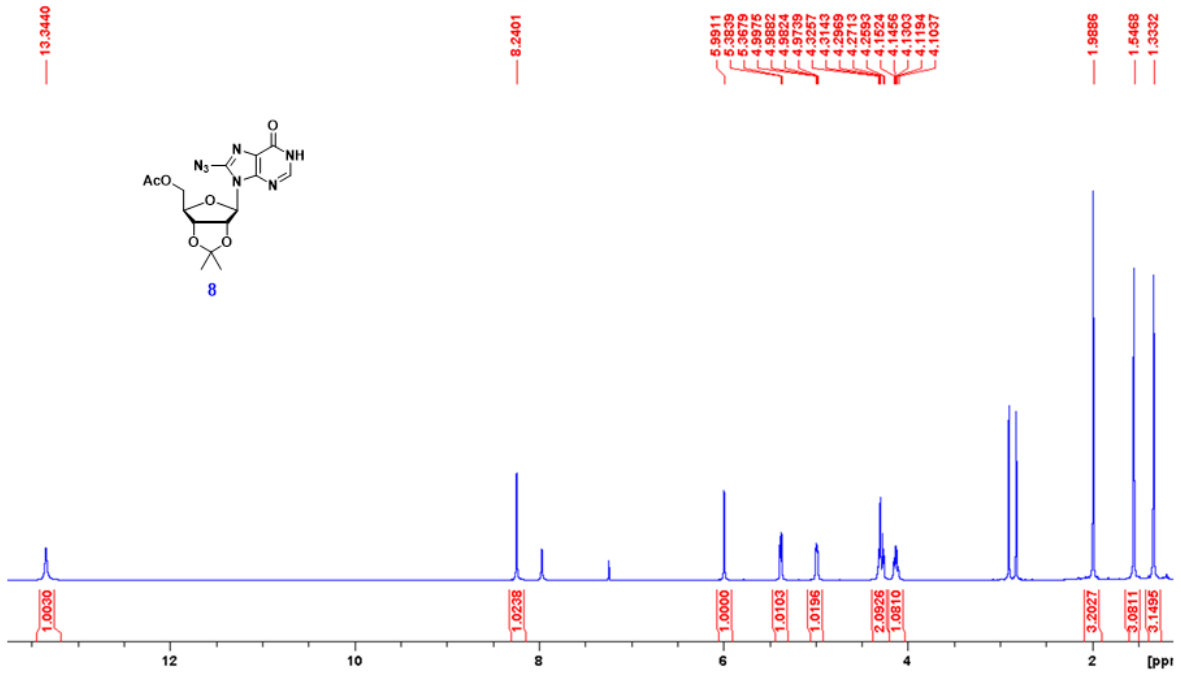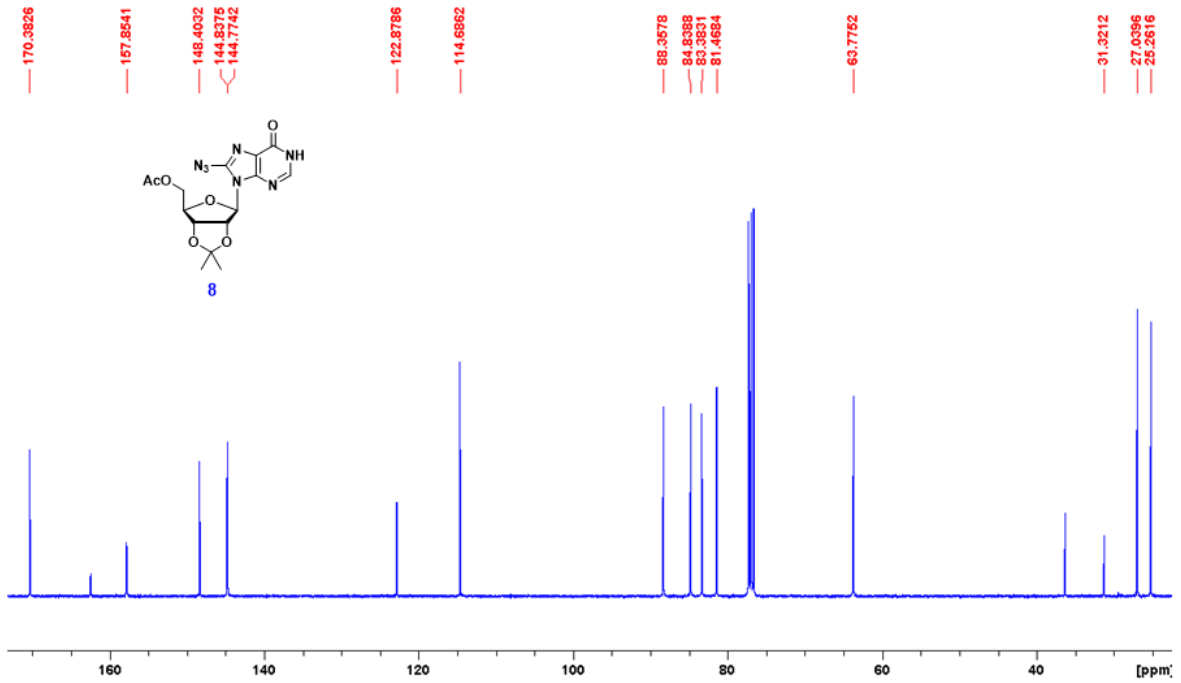

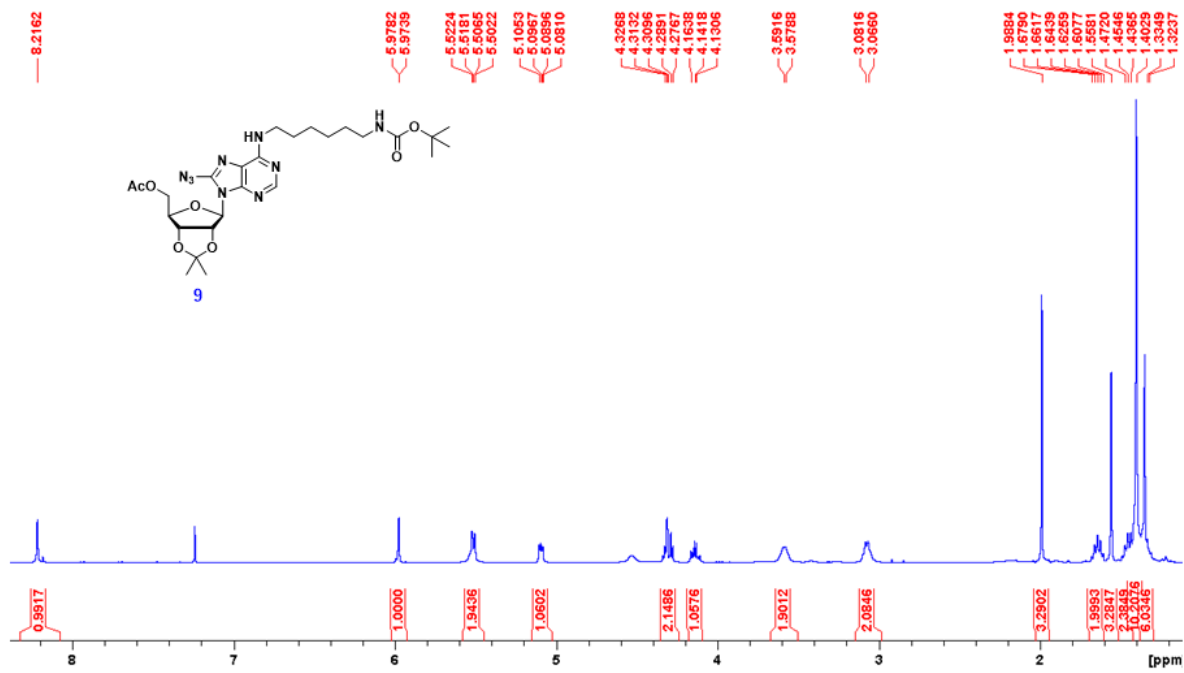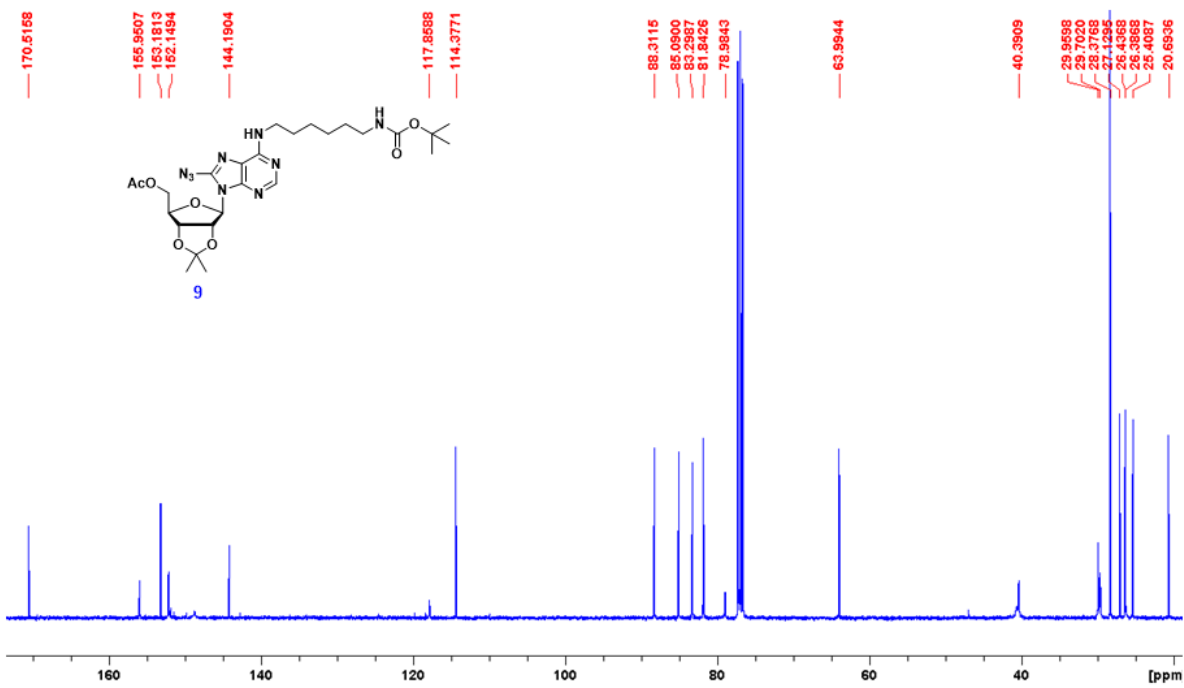

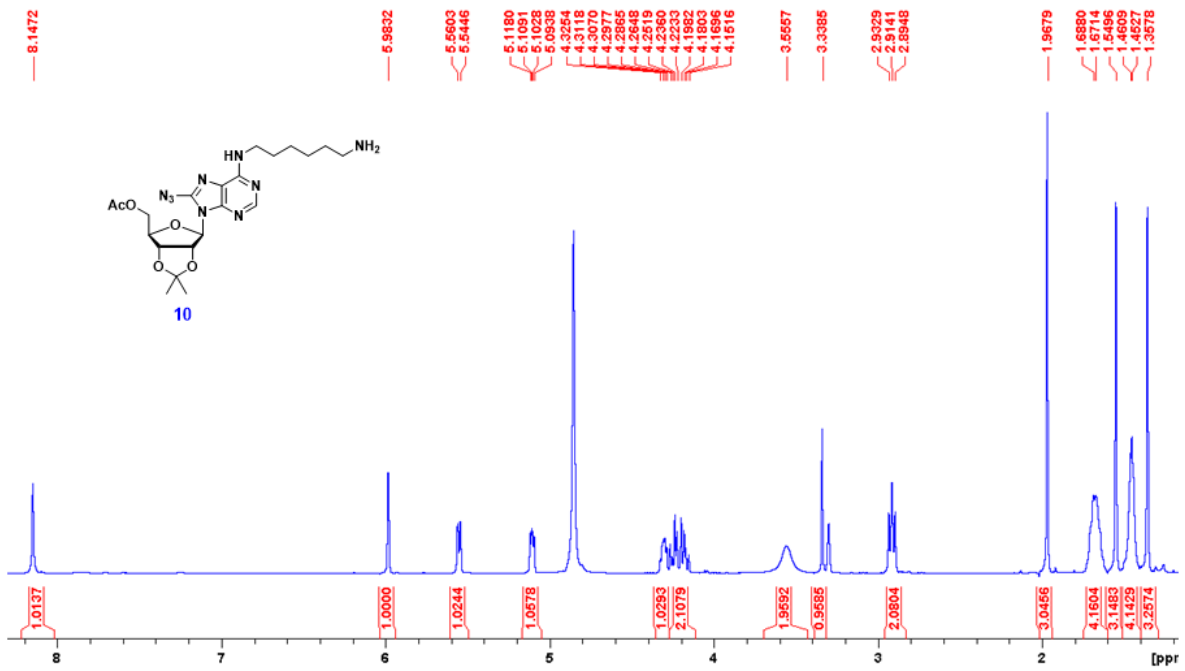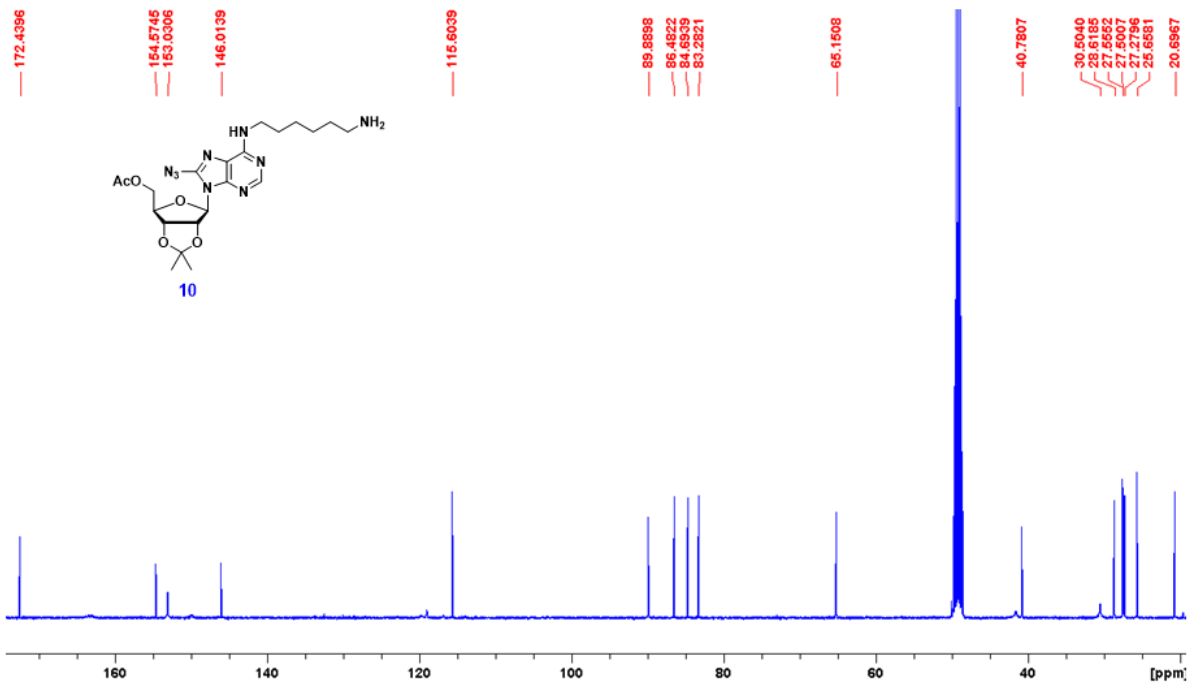

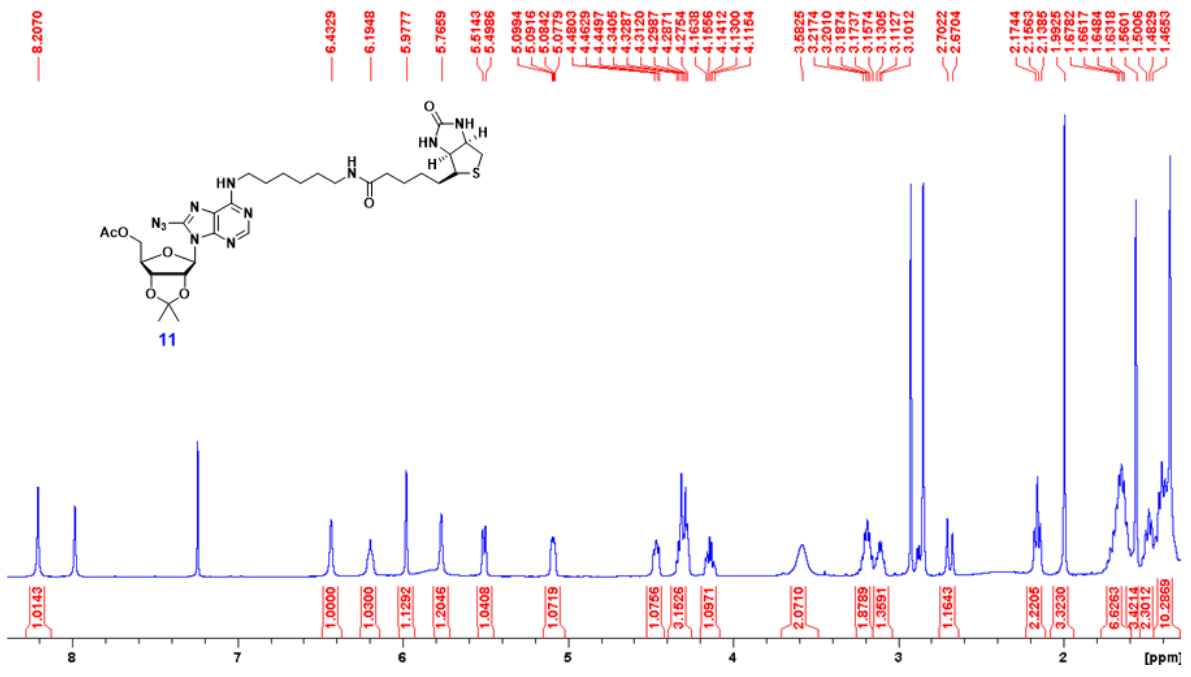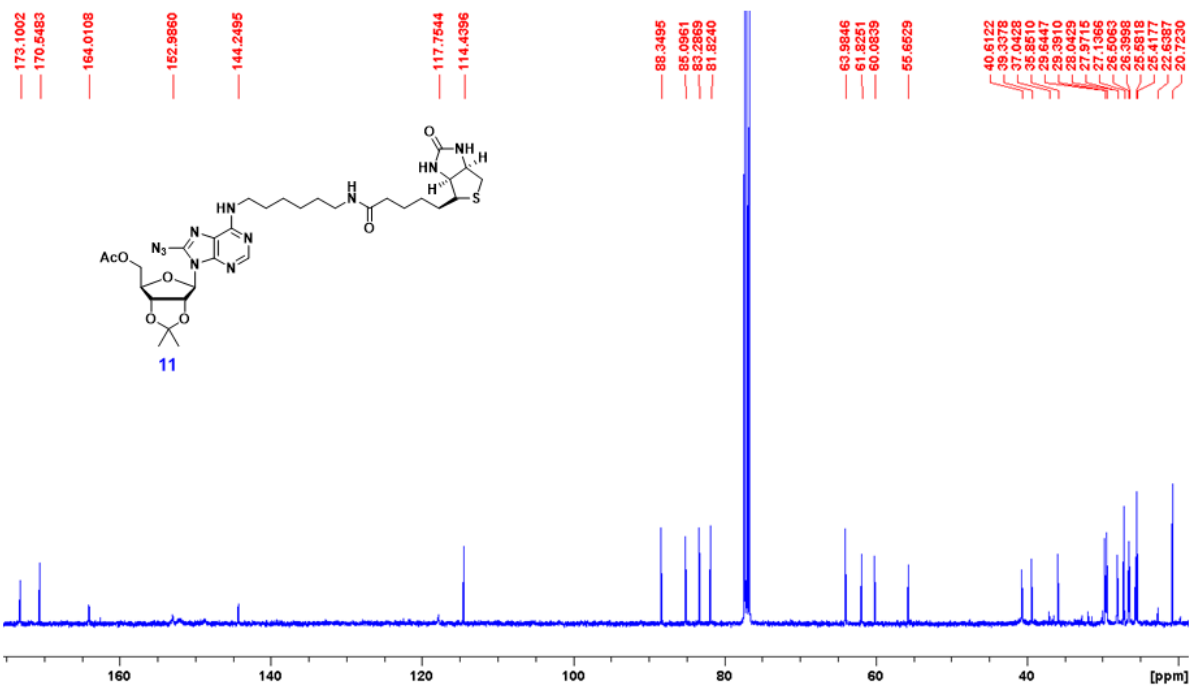

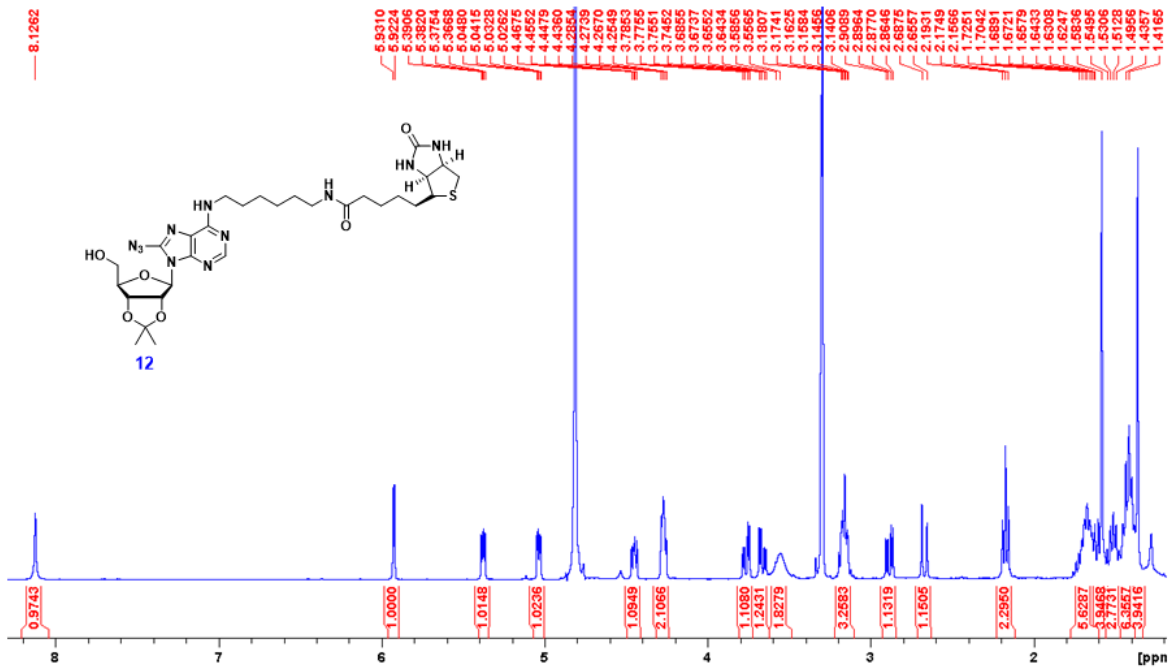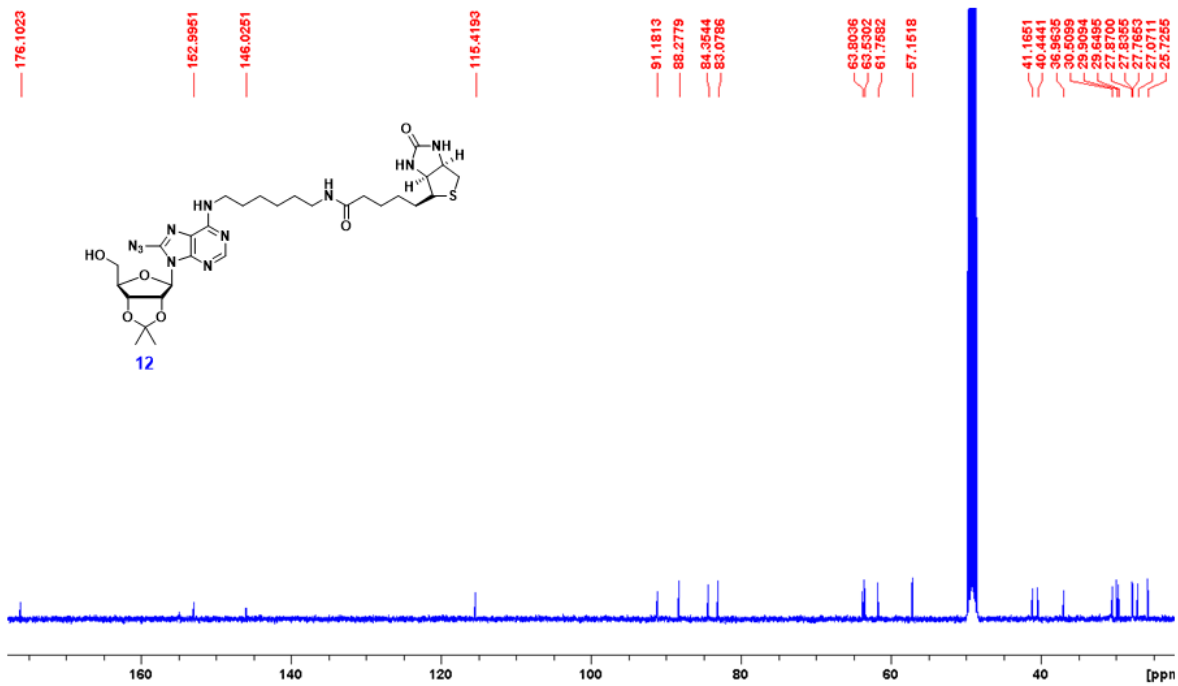

Supplement: d1ra08794k1.pdf [file d1ra08794k1.pdf]
